# Supplementary material
Source: publisher figshare collection journal article supplement (https://acs.figshare.com/ndownloader/files/5125351)
Supplement: Supplementary file 1 [file 5125351]

Identification and Structure Activity of Phenolic Acyl Hydrazones as Selective Agonists for the Estrogen-Related Orphan Nuclear Receptors ERR $\beta$  and ERR $\gamma$

William J. Zuercher,<sup>1\*</sup> Stephanie Gaillard,<sup>2</sup> Esther Y. H. Chao,<sup>1</sup> Barry G. Shearer,<sup>1</sup> Lisa A. Orband-Miller,<sup>1</sup> Randy K. Bledsoe, Thomas G. Consler, David G. Jones,<sup>1</sup> Aaron B. Miller,<sup>1</sup> Jon L. Collins,<sup>1</sup> Donald P. McDonnell,<sup>2</sup> and Timothy M. Willson<sup>1</sup>

<sup>1</sup>Discovery Research, GlaxoSmithKline, Five Moore Drive, Research Triangle Park, NC 27707

<sup>2</sup>Department of Pharmacology and Cancer Biology, Duke University, Levine Science Research Center, Research Drive, Durham, NC 27710

\* Address correspondence to: William J. Zuercher, GlaxoSmithKline, High Throughput Chemistry, NTH-M2127, Five Moore Drive, Research Triangle Park, NC 27709; tel: (919) 483-5275; e-mail: [william.j.zuercher@gsk.com](mailto:william.j.zuercher@gsk.com)

**Table of Contents**

Synthetic Procedures: S2-S3

Assay Protocols: S3-S4

## Supporting Information

### General procedure for the solid-phase synthesis of acyl hydrazones:

*Step 1, phenol loading.* Mimotopes Technologies Synphase Hydroxymethyl (Wang) lanterns (30 units, 36  $\mu\text{mol}$  reported loading per support) were added to a solution of  $\text{PPh}_3$  (1.7 g, 6.5 mmol) in  $\text{CH}_2\text{Cl}_2$  (25 mL).  $\text{CBr}_4$  (2.3 g, 7.0 mmol) was added and the reaction mixture was agitated for 2 h at which time the solution was filtered off and the lanterns washed  $\text{CH}_2\text{Cl}_2$  ( $3 \times 20$  mL) and dried by evaporation. The lanterns were then suspended in DMF (25 mL) and 4-hydroxybenzaldehyde (0.85 g, 7.0 mmol) and  $\text{Cs}_2\text{CO}_3$  (2.3 g, 7.0 mmol) were added. After agitation for 16 h, the reaction mixture was filtered off and the lanterns were washed with  $\text{H}_2\text{O}$  ( $3 \times 25$  mL), DMF ( $3 \times 25$  mL), MeOH ( $3 \times 25$  mL), and  $\text{CH}_2\text{Cl}_2$  ( $3 \times 25$  mL).

*Step 2, oxidation:* The aldehyde-laden lanterns from step 1 were suspended in a mixture of  $\text{H}_2\text{O}$  (10 mL), DMF (10 mL) and 2-methyl-2-butene (10 mL, 1M in  $\text{CH}_2\text{Cl}_2$ ). To the mixture was added  $\text{H}_2\text{NSO}_3\text{H}$  (0.68 g, 7.0 mmol) and  $\text{NaClO}_2$  (0.63 g, 7.0 mmol) in one portion. The initially yellow reaction mixture turns clear and colorless after about 15 min. The reaction is allowed to proceed for 4 h, at which time the lanterns are filtered and washed with  $\text{H}_2\text{O}$  ( $3 \times 25$  mL), 10% HOAc in DMF ( $3 \times 25$  mL), MeOH ( $3 \times 25$  mL), and  $\text{CH}_2\text{Cl}_2$  ( $3 \times 25$  mL).

*Step 3, activation as perfluorophenyl ester and hydrazide formation:* The aforementioned acid-bound lanterns from step 2 were suspended in DMF. Pyridine (0.52 mL, 6.5 mmol) followed by perfluorophenyl trifluoroacetate (1.2 mL, 7.0 mmol) were added and the reaction mixture was agitated for 4 h. The lanterns were then filtered off and washed with DMF ( $3 \times 25$  mL), THF ( $3 \times 25$  mL), and  $\text{CH}_2\text{Cl}_2$  ( $3 \times 25$  mL). The lanterns were then suspended in DMF (25 mL) and  $\text{H}_2\text{NNH}_2$  (0.22 mL, 7.0 mmol) was added. The reaction was allowed to proceed for 16 h before filtration and washing with DMF ( $3 \times 25$  mL), MeOH ( $3 \times 25$  mL), and  $\text{CH}_2\text{Cl}_2$  ( $3 \times 25$  mL).

*Step 4, acyl hydrazone formation and cleavage:* A resin-bound hydrazide lantern was suspended in DMSO (1 mL) followed by addition of HOAc (25  $\mu\text{L}$ ) and an aldehyde (0.2 mmol). The reaction was agitated for 16 h and then filtered and washed with DMF ( $3 \times 25$  mL), MeOH ( $3 \times 25$  mL), and  $\text{CH}_2\text{Cl}_2$  ( $3 \times 25$  mL). Cleavage of the intermediate by exposure to 95:5  $\text{CF}_3\text{CO}_2\text{H}$ :  $\text{H}_2\text{O}$  for 1 h was followed by concentration under vacuum. DMFu quantitation, conducted according to the method of Gerritz and Sefler (Gerritz, S. W.; Sefler, A. M. 2,5-Dimethylfuran (DMFu): An Internal Standard for the "Traceless" Quantitation of Unknown Samples via  $^1\text{H}$  NMR. *J. Comb. Chem.* **2000**, 2, 39) showed a loading of approximately 12-15  $\mu\text{mol}$  of acyl hydrazone products (reported theoretical loading 35  $\mu\text{mol}$ ).

### Solution phase synthesis of 4-Hydroxybenzoic acid, 4'-

**isopropylbenzylidenehydrazide (3, GSK4716).** A mixture of 4-hydroxybenzoic hydrazide (1.0 mmol) and 4-isopropylbenzaldehyde (1.0 mmol) was dissolved in n-propanol and heated to  $60^\circ\text{C}$ . After 12 h, Argonaut Technologies PS-NHNH<sub>2</sub> (0.14 g, 3.65 mmol  $\text{g}^{-1}$ ) and Argonaut Technologies PS-CHO (0.43 g, 1.15 mmol  $\text{g}^{-1}$ ) were added and the reaction mixture was agitated at RT for 12 h. Filtration of the reaction mixture to remove the scavenger reagents followed by concentration of the filtrate under vacuum yielded **3** (g, %).  $^1\text{H}$  NMR (400 MHz, MeOD-*d*<sub>4</sub>)  $\delta$  = 8.30 (1H, s), 7.85 (2H, d, *J* = 8.7 Hz), 7.77 (2H, d, *J* = 8.1 Hz), 7.33 (2H, d, *J* = 8.1 Hz), 6.90 (2H, d, *J* = 8.7 Hz), 2.96 (1H,

h, J = 6.9 Hz), 1.29 (6H, d, J = 6.9 Hz);  $^{13}\text{C}$  (500 MHz, MeOD- $d_4$ )  $\delta$  = 166.7, 162.6, 152.7, 150.1, 133.2, 130.8, 128.9, 127.7, 124.9, 116.2, 35.5, 24.2; Anal ( $\text{C}_{17}\text{H}_{18}\text{N}_2\text{O}_2$ ) calc C 72.32, H 6.43, N 9.92, found C 70.68, H, 6.58, N 9.40; HPLC Method (Luna 30 x 4.6 mm column, 10 to 100% MeOH in  $\text{H}_2\text{O}$  with 0.5%  $\text{HCO}_2\text{H}$  over 3 min, flow rate 2.3  $\text{mL min}^{-1}$ ):  $R_t$  = 2.47 min, purity > 99%; MS ESI $^+$   $m/z$  284 ( $\text{MH}^+$ ); MS ESI  $m/z$  282 ( $\text{M}$ ); HRMS calcd for  $\text{C}_{17}\text{H}_{18}\text{N}_2\text{O}_2$  283.1447, found 283.1439.

| Elemental Analysis for <b>3</b> |      |      |       |      |      |
|---------------------------------|------|------|-------|------|------|
| Calculated                      |      |      | Found |      |      |
| C                               | H    | N    | C     | H    | N    |
| 72.32                           | 6.43 | 9.92 | 72.68 | 6.58 | 9.40 |

**ERR $\gamma$  FRET assay experimental** – Protein-protein interactions were assayed by FRET detection. Proteins were set up in a one to one ratio of Europium labeled streptavidin (Wallac CR28-100)-ERR $\gamma$ : APC labeled streptavidin (Molecular Probes #S-868) -RIP140 Complex. The RIP140 peptide (LCD2, 373-392) B-LERNNIKQAANNSLLLHLLKSQTIP-CONH $_2$  was prepared by SynPep. In the sequence, B represents biotin, CONH $_2$  indicates an amidated C-terminus and the other letters refer to the standard one letter amino acid code. The buffer for this system was made at 50 mM Hepes (pH 7), 50 mM KCl, 1 mM EDTA, in 1 L of deionized water. This buffer was then filtered with the Corning (431205) filter system with a 0.22 $\mu\text{m}$  cellulose Acetate filter. After filtering there was an addition of 0.1 mg/mL BSA (fatty acid free), and 2mM Chaps. Before using the buffer in the assay 10mM DTT was added to the appropriate amount of buffer. The proteins were incubated for 30 minutes then excess biotin was added to fill vacant streptavidin (SA) sites. Protein mixture was added to prepared plates. They were then counted on the Wallac, Victor, and counts were then analyzed.

**ERR $\gamma$  cell-based assay experimental:** Plasmids – 3xERE-TATA-Luc has been described previously (Chang, C.; Norris, J.D.; Grøn, H.; Paige, L.A.; Hamilton, P.T.; Kenan, D.J.; Fowlkes, D.; McDonnell, D. P. Dissection of the LXXLL Nuclear Receptor-Coactivator Interaction Motif Using Combinatorial Peptide Libraries: Discovery of Peptide Antagonists of Estrogen Receptors  $\alpha$  and  $\beta$ . *Mol. Cell. Biol.* **1999**, *19*, 8226-8239.), pCMV $\beta$  (Clontech), pcDNA3 (Invitrogen), pcDNA-f-PGC-1 $\alpha$  (gift of P. Puigserver), pcDNA3-ERR $\alpha$  and pcDNA3-ERR $\beta$  were subcloned from pCMX-ERR $\alpha$  and pCMX-ERR $\beta$ , respectively. Human ERR $\gamma$  was cloned from a human kidney cDNA library (Clontech) and subcloned into pcDNA3.

**Cell Culture and Transient Transfection Assays** – Human cervical carcinoma (HeLa) cells (ATCC) were cultured in minimum essential medium (Invitrogen) supplemented with 8% fetal bovine serum (HyClone), 0.1mM nonessential amino acids, and 1 mM sodium pyruvate (Invitrogen) and maintained in a humidified 37°C incubator with 5% CO $_2$ . For transient transfections, cells were split into 24-well plates 24 h before transfection. Prior to transfection the media was replaced with minimal essential medium without phenol red (Invitrogen) containing 8% charcoal stripped serum (Hyclone). Each transfection was performed in triplicate using Lipofectin (Invitrogen) transfection reagent. A DNA-Lipofectin mixture containing a total of 3mg of total DNA per triplicate

was incubated with the cells. Each transfection contained 1,000 ng of 3xERE-TATA-Luc reporter, 50ng of pCMV $\beta$ , 10ng of either pcDNA3-empty, pcDNA3-ERR $\alpha$ , pcDNA3-ERR $\beta$ , or pcDNA3-ERR $\gamma$ , either 70ng pcDNA3-empty or 100ng pcDNA-f-PGC-1 $\alpha$ , and pBSII comprised the remainder of the 3mg of total plasmid. Ligands were added to the cells at the time of transfection and the luciferase and  $\beta$ -galactosidase activities were measured 24-30h later. Luciferase activity was normalized to the activity of the cotransfected pCMV $\beta$  plasmid. All transfections were performed at least three times, data shown are results of representative experiments.
